# Supplementary material
Source: PubMed Central journal article supplement (PMC2262169)

**Supplementary Figure 1:** Structure of the  $Ar^{invflox(ex1-neo)Y}$  locus. (A) The wild-type  $Ar$  locus where splicing occurs normally between exons 1 and 2. (B) The  $Ar^{invflox(ex1-neo)}$  locus produces a hypomorphic  $Ar$  phenotype because of reduced AR protein. The reduction in AR protein is the result of a cryptic splice acceptor within the *neomycin resistance* cassette ( $Neo^R$ ) within intron 1 of  $Ar$ , generating a truncated transcript. When the CRE recombinase is supplied via a transgenic construct, the sequences between the *loxP* sites (gray triangles) is inverted, leading to disruption of the  $Ar$  locus and a null  $Ar$  phenotype. The null allele generated with CRE recombinase was not used in the course of this study but is described in (19).

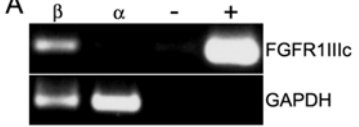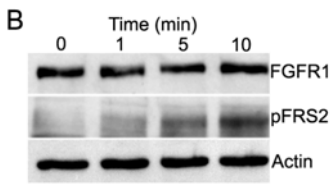

Supplement: mend_me.2006-0534_1.pdf [file mend_me.2006-0534_1.pdf]
